# Supplementary figures and images for: HBcrAg values may predict virological and immunological responses to pegIFN-α in NUC-suppressed HBeAg-negative chronic hepatitis B
Source: PubMed Central journal article supplement — Gut. 2024 Jul 20;73(10):e332290. doi: 10.1136/gutjnl-2024-332290 (PMC11423235; doi:10.1136/gutjnl-2024-332290), 2024-07-20

**A**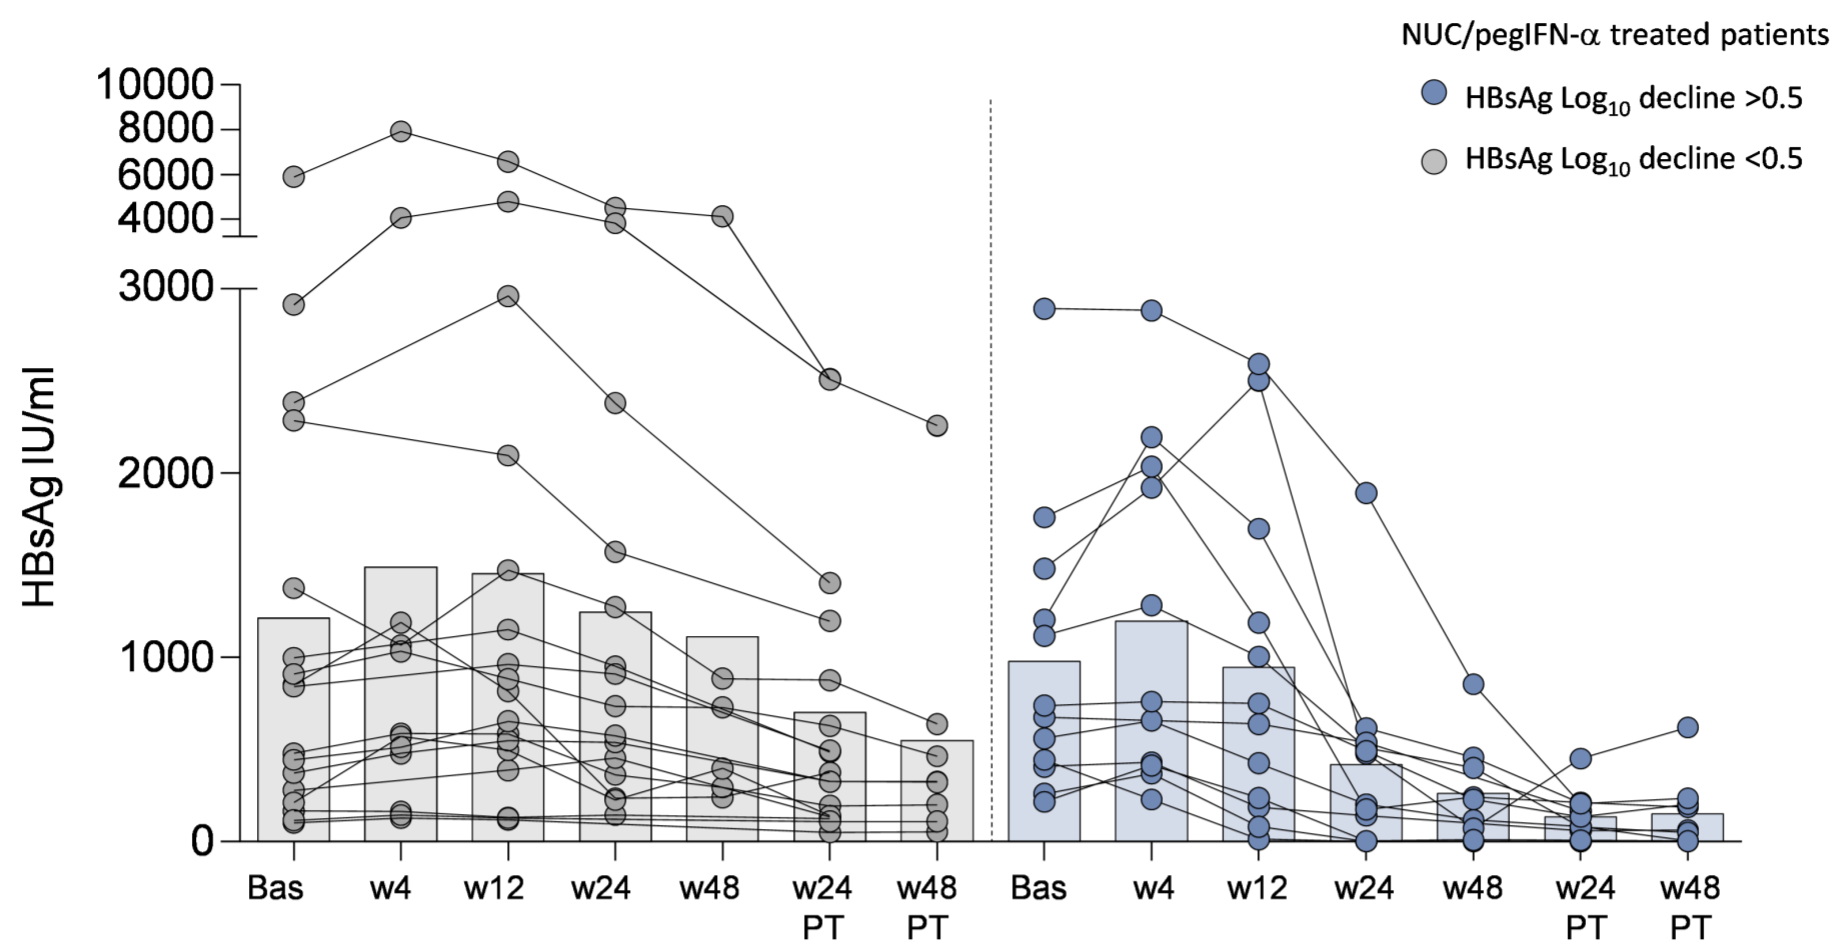**B**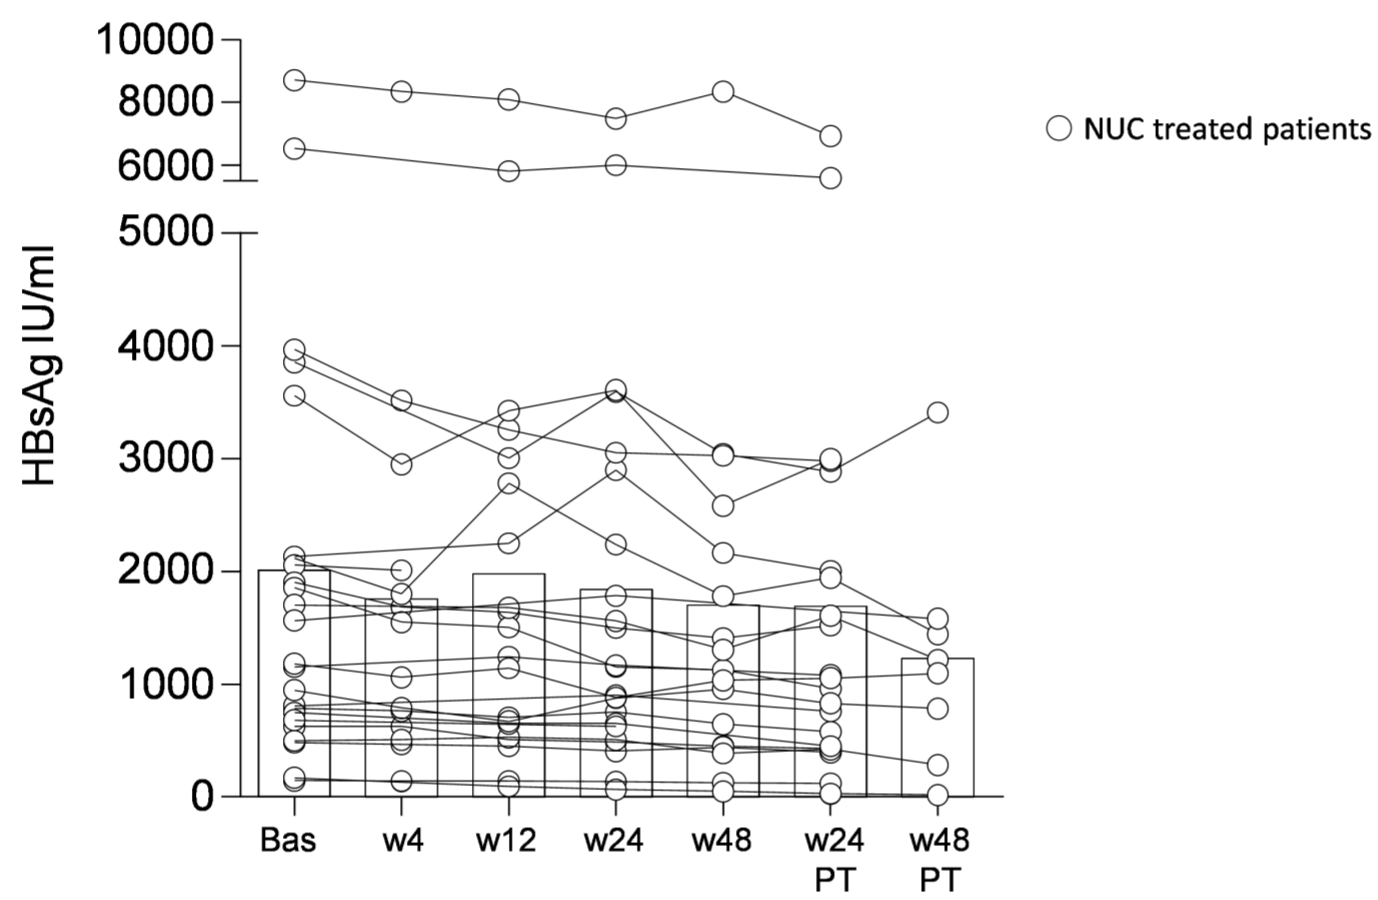

Supplementary Figure 1

Supplement: gutjnl-2024-332290supp002.pdf [file gutjnl-2024-332290supp002.pdf]

A

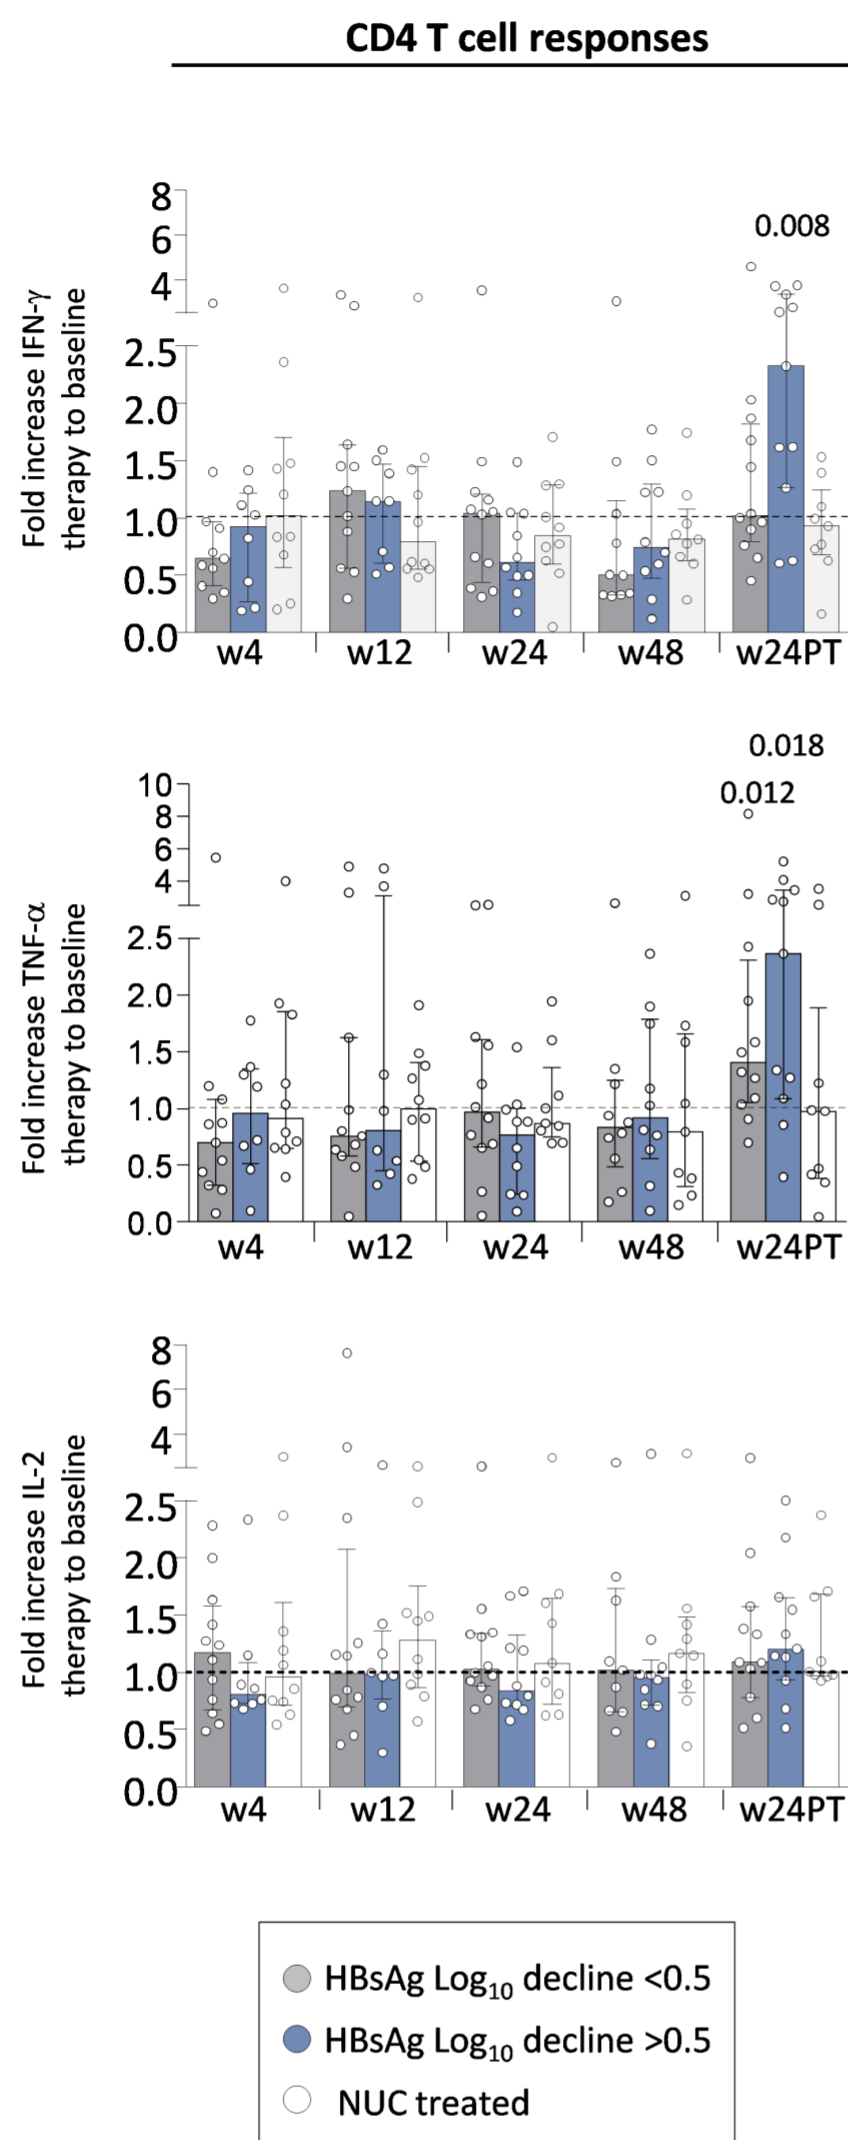

B

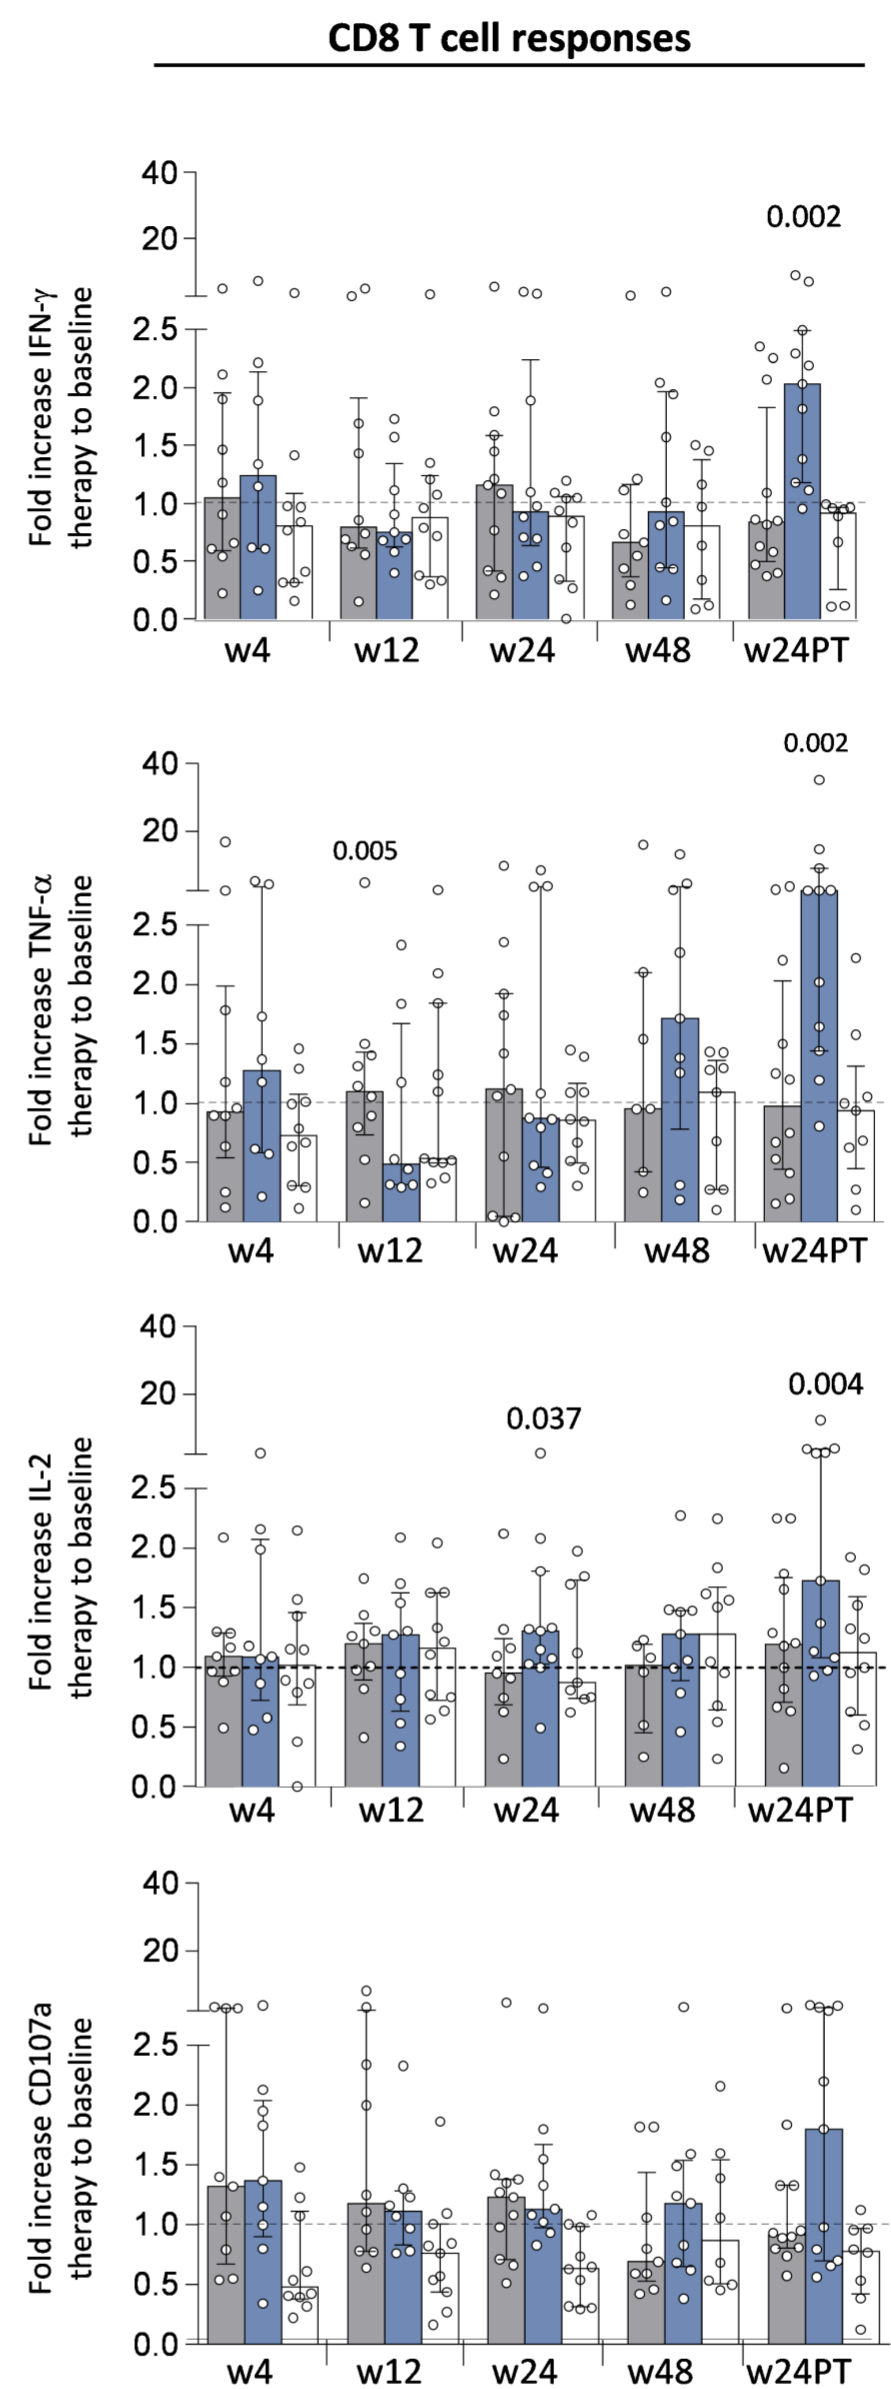

Supplementary Figure 2

Supplement: gutjnl-2024-332290supp003.pdf [file gutjnl-2024-332290supp003.pdf]

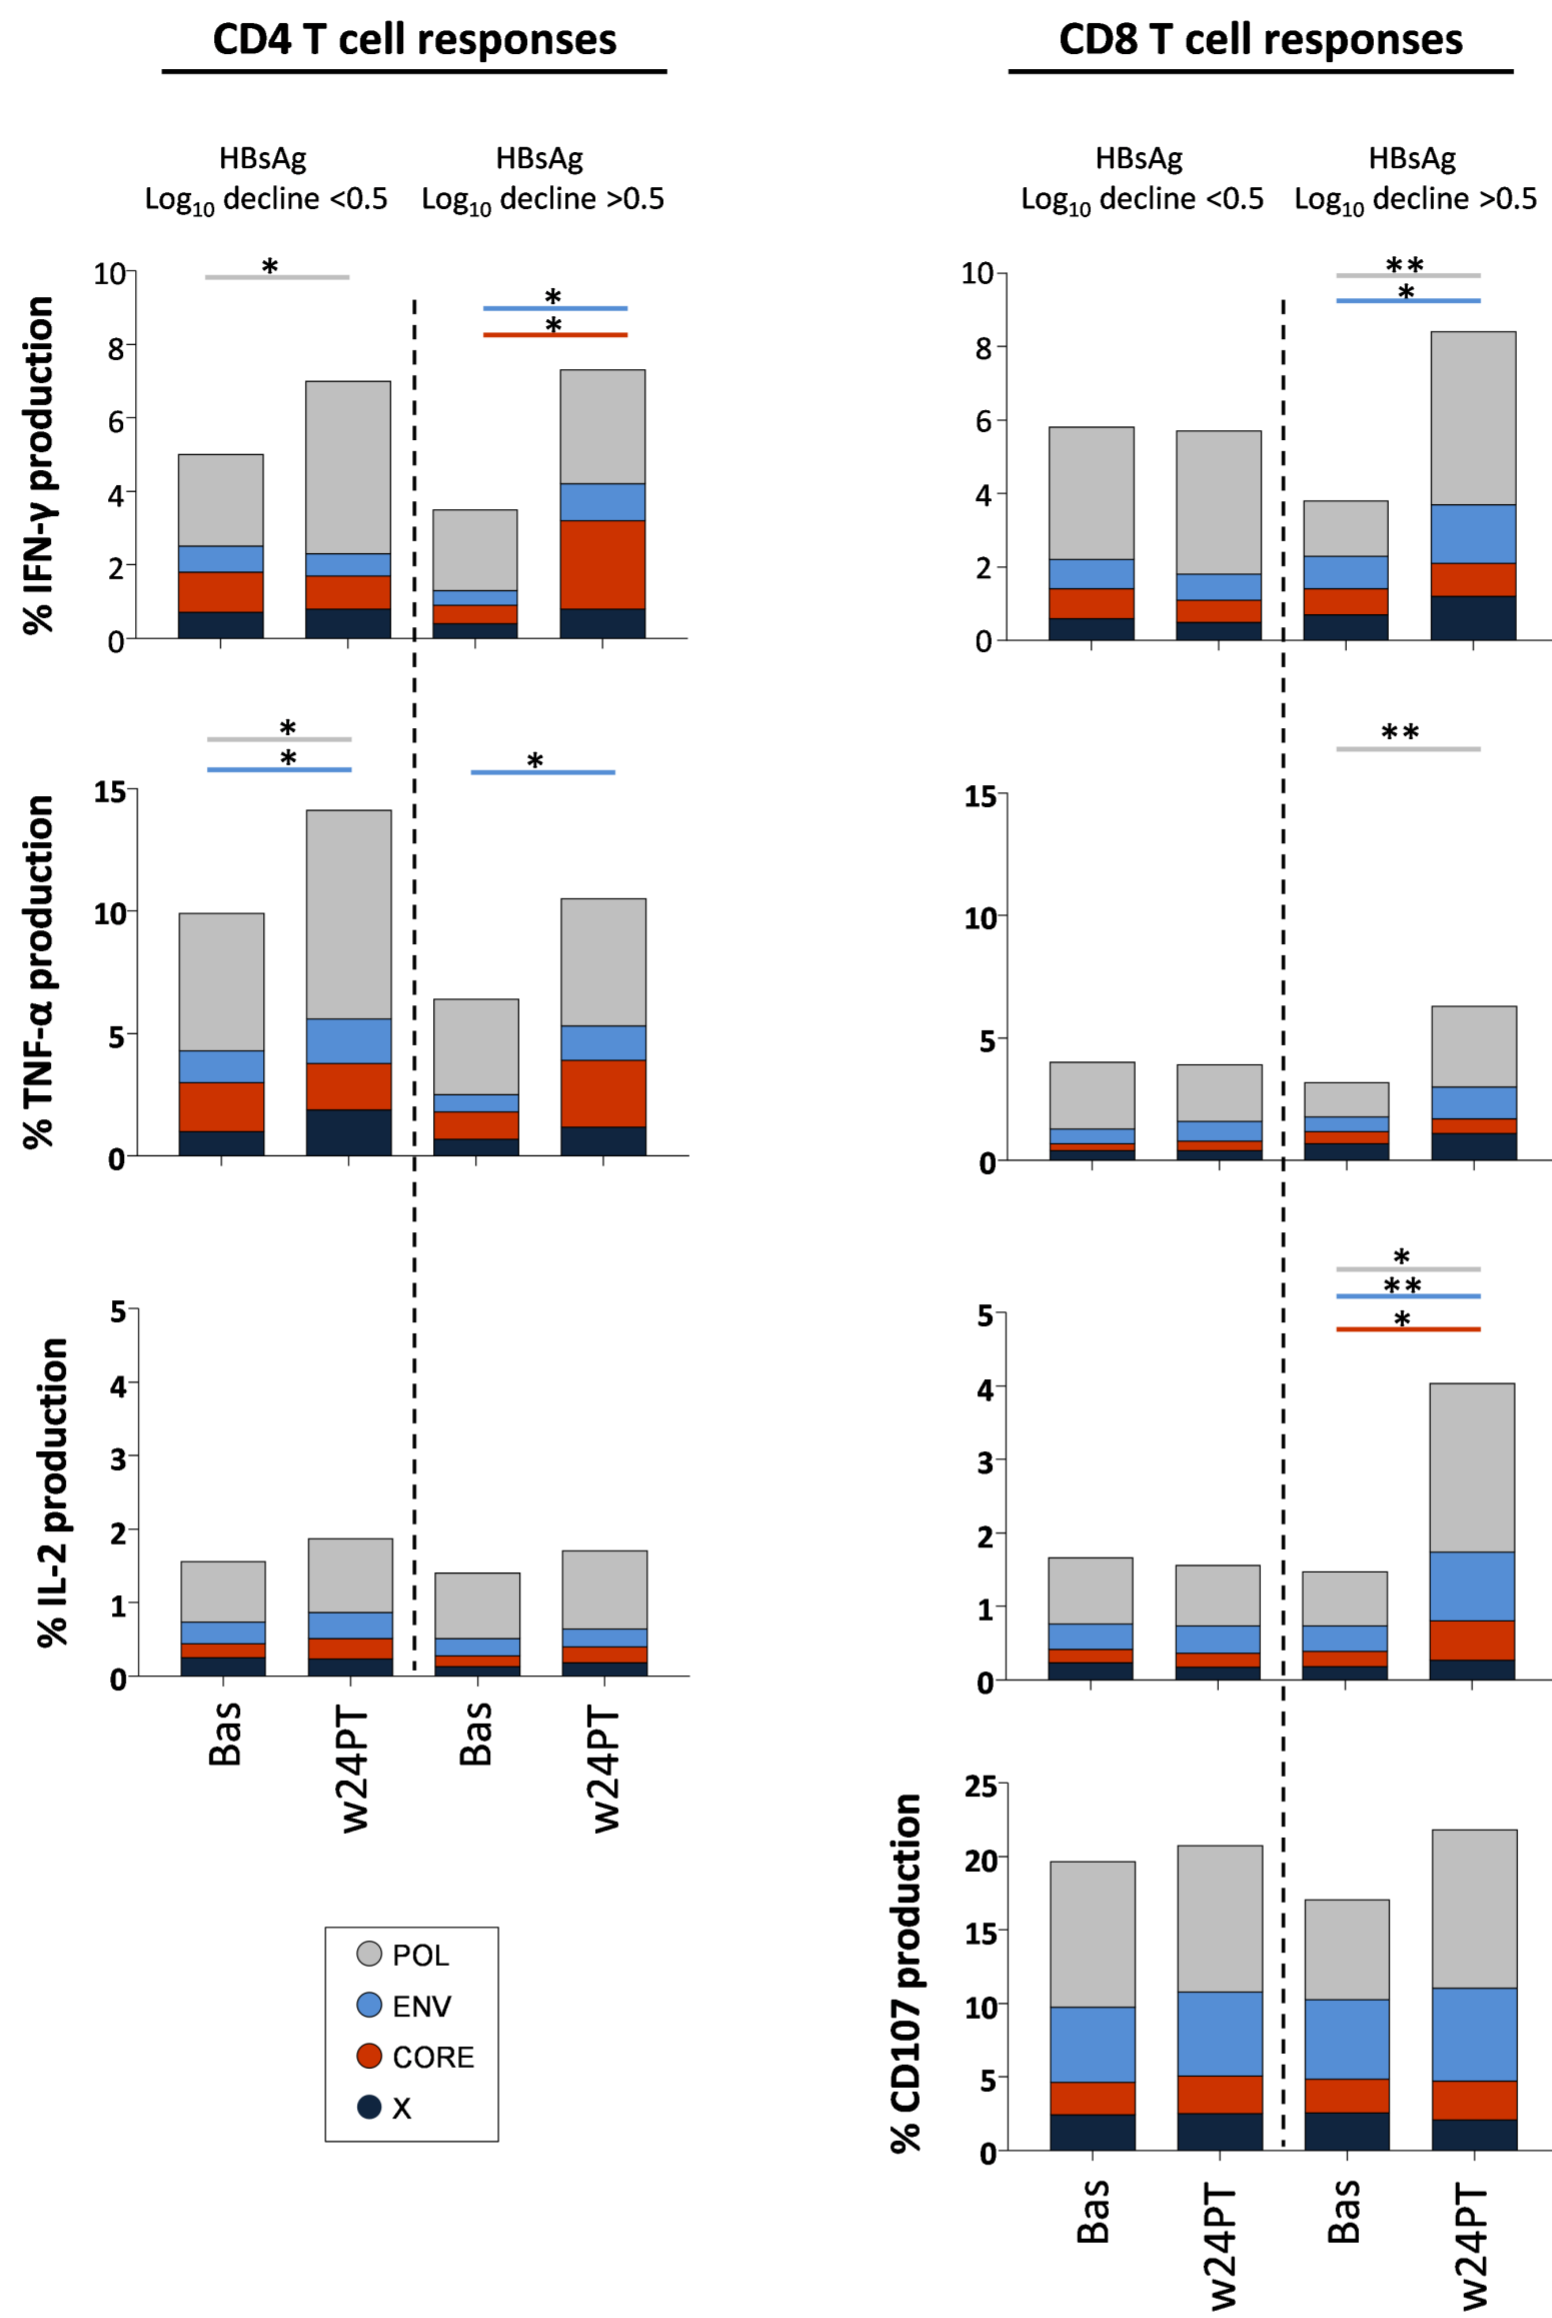

Supplementary Figure 3

Supplement: gutjnl-2024-332290supp004.pdf [file gutjnl-2024-332290supp004.pdf]
