# Supplementary figures and images for: HBcrAg values may predict virological and immunological responses to pegIFN-α in NUC-suppressed HBeAg-negative chronic hepatitis B
Source: HighWire-hosted journal article supplement (doi:10.1136/gutjnl-2024-332290), 2024-07-20

A

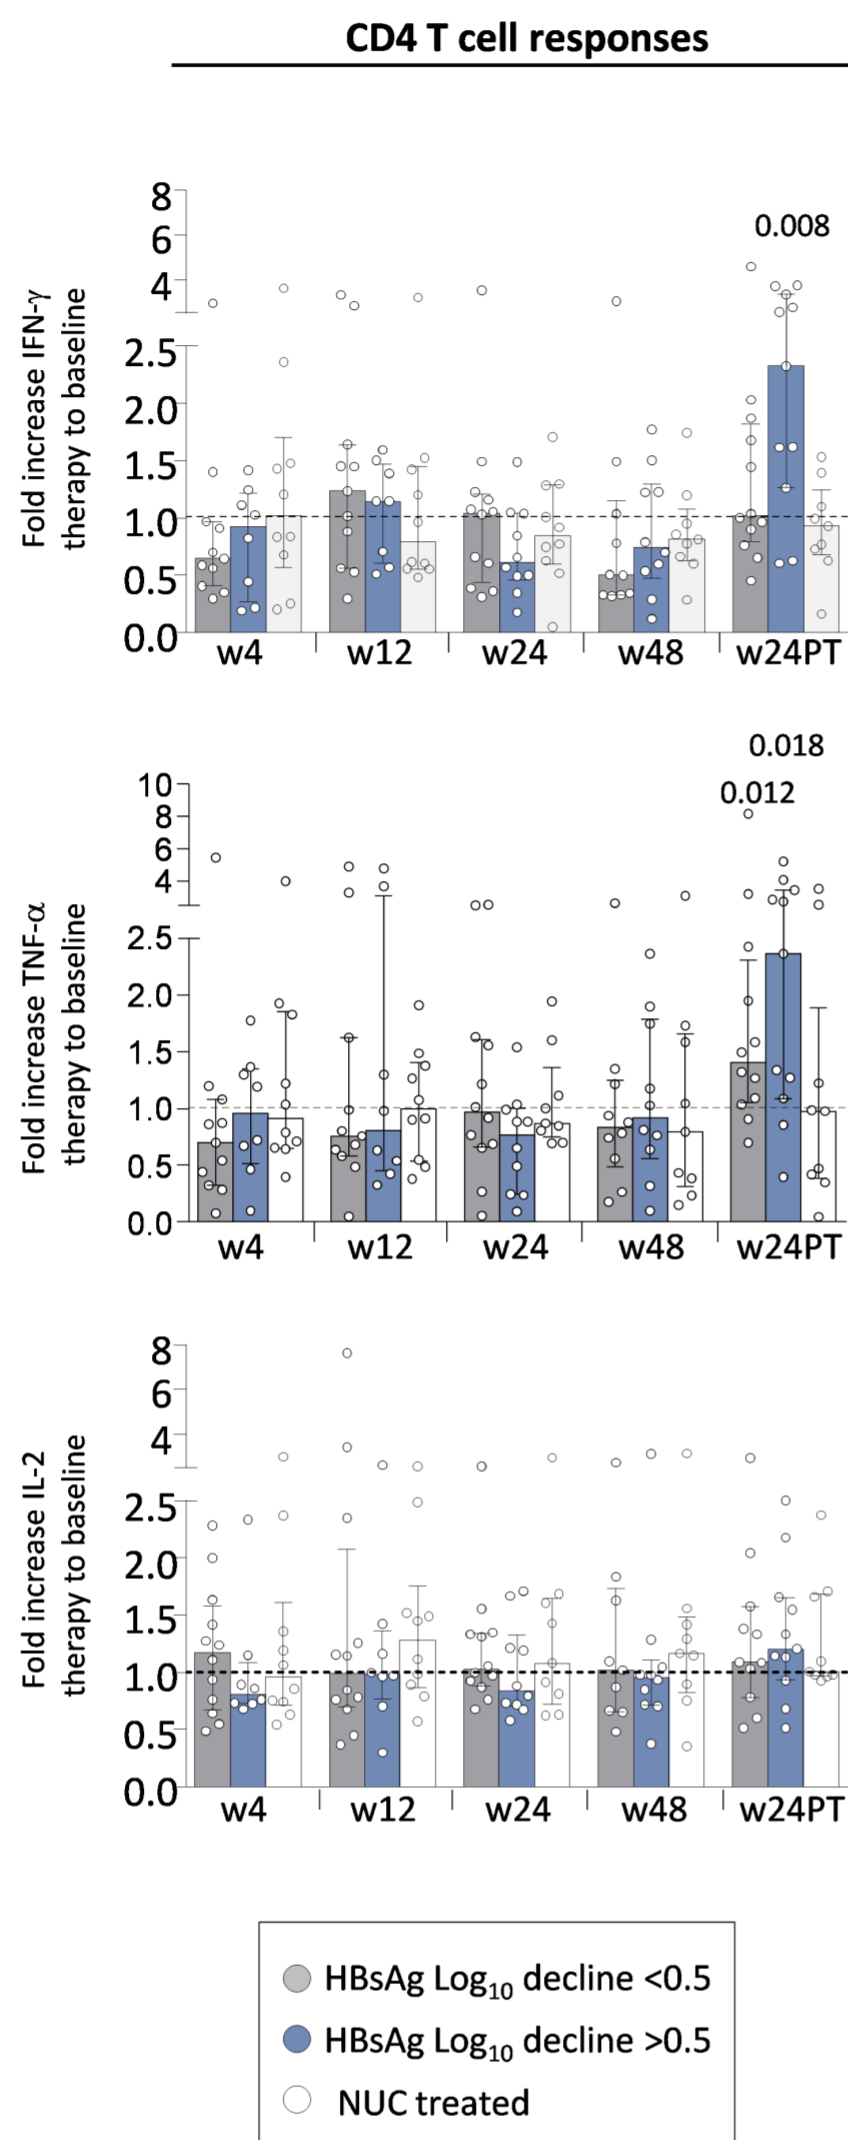

B

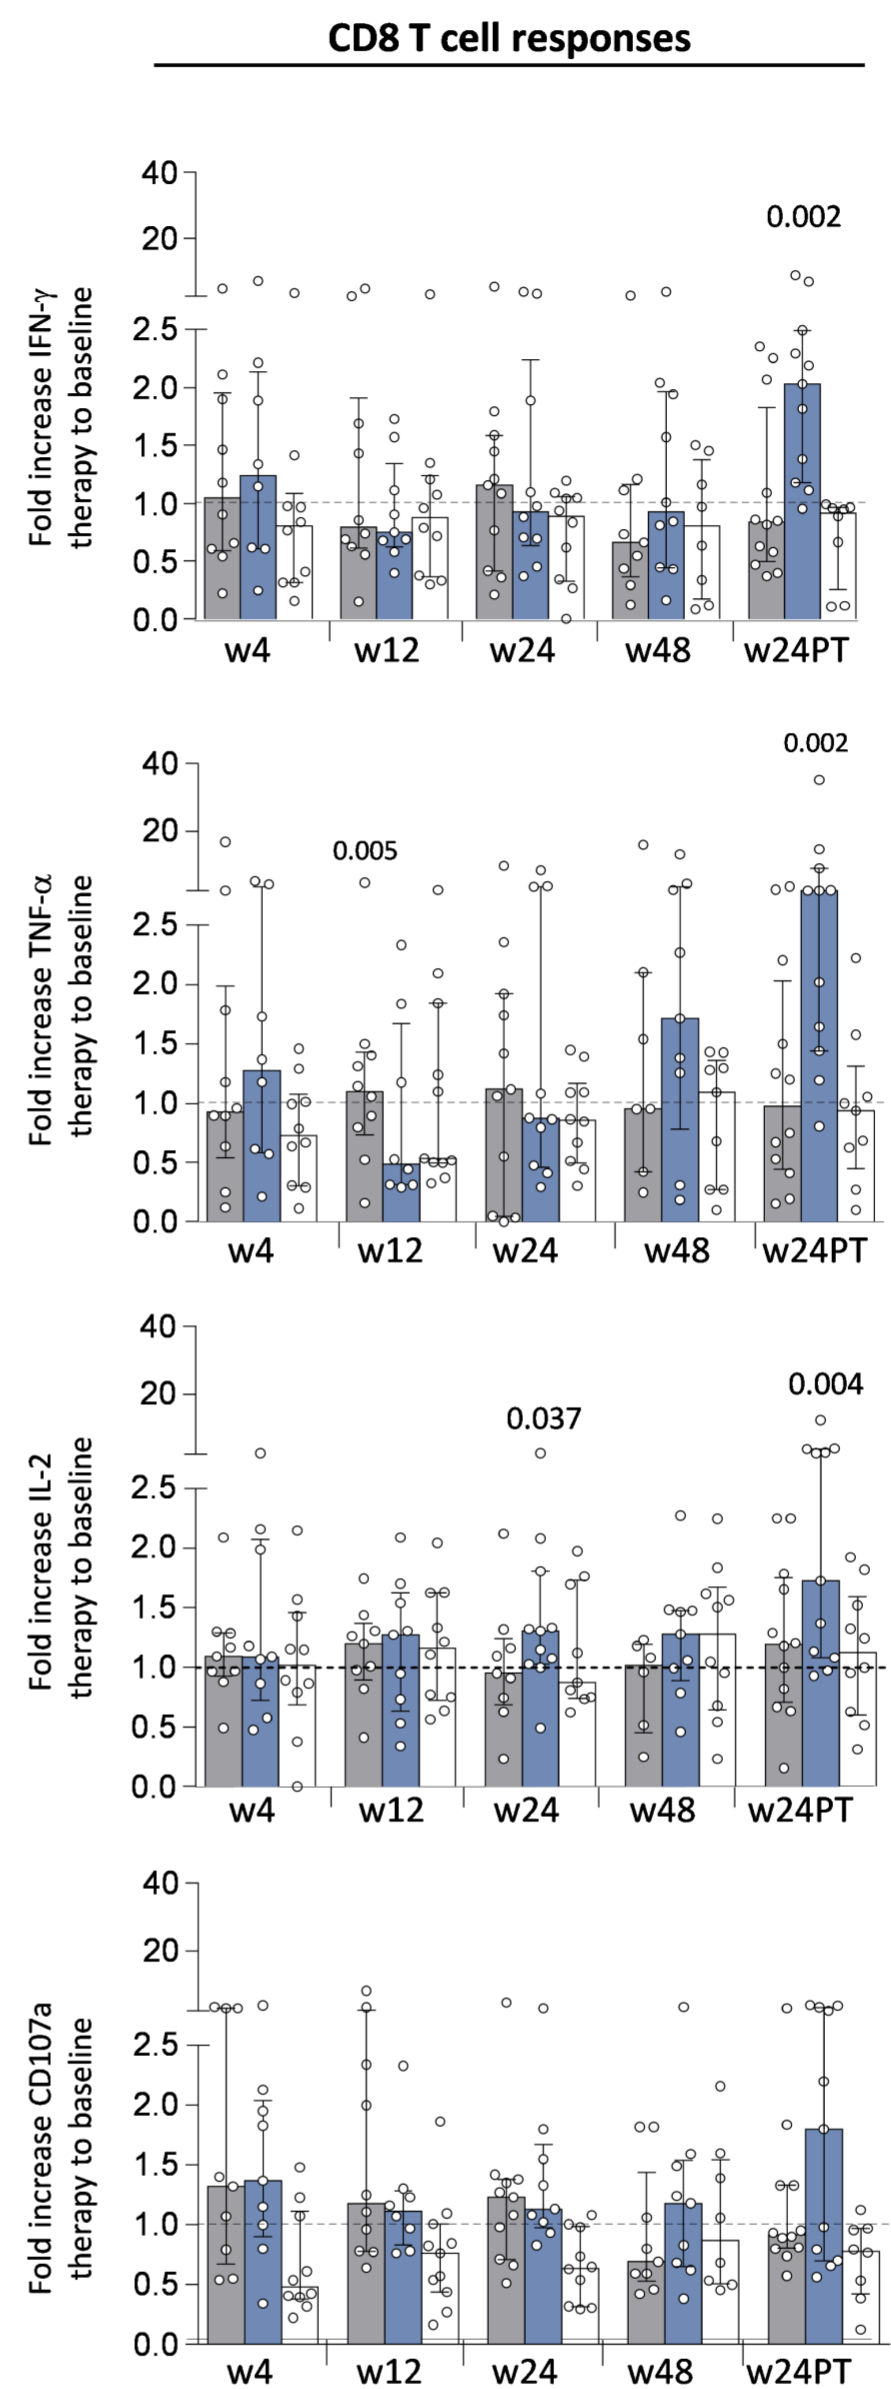

Supplementary Figure 2

Supplement: gutjnl-2024-332290supp003_data_supplement.pdf [file gutjnl-2024-332290supp003_data_supplement.pdf]
